# Supplementary material for: Simultaneous Determination of Steroids and NSAIDs, Using DLLME-SFO Extraction and HPLC Analysis, in Milk and Eggs Collected from Rural Roma Communities in Transylvania, Romania
Source: MDPI journal article supplement (doi:10.3390/molecules29010096), 2023-12-22
Supplement: s1 [file s1]

Article

# Simultaneous Determination of Steroids and NSAIDs, Using DLLME-SFO Extraction and HPLC Analysis, in Milk and Eggs Collected from Rural Roma Communities in Transylvania, Romania

Mihaela Cătălina Herghelegiu <sup>1</sup>, Vlad Alexandru Pănescu <sup>1</sup>, Victor Bocoș-Bințișan <sup>1,\*</sup>, Radu-Tudor Coman <sup>2</sup>, Vidar Berg <sup>3</sup>, Jan Ludvig Lyche <sup>3</sup>, Maria Concetta Bruzzoniti <sup>4</sup> and Mihail Simion Beldean-Galea <sup>1,\*</sup>

<sup>1</sup> Faculty of Environmental Science and Engineering, Babeș-Bolyai University, 1 Kogălniceanu Str., 400084 Cluj-Napoca, Romania

<sup>2</sup> Faculty of Medicine, "Tuliu Hațieganu" University of Medicine and Pharmacy, 8 Babeș Str., 400012 Cluj-Napoca, Romania

<sup>3</sup> Faculty of Veterinary Medicine, Norwegian University of Life Sciences, 1433 Ås-Oslo, Norway

<sup>4</sup> Department of Chemistry, University of Turin, via P. Giuria 5, 10125 Turin, Italy; mariaconcetta.bruzzoniti@unito.it

\* Correspondence: victor.bocos@ubbcluj.ro (V.B.-B.); simion.beldean@ubbcluj.ro (M.S.B.-G.)

The supplementary information contains 10 pages, and includes 6 tables and 2 figures.

### **List of contents of the supplementary information:**

**Table S1.** The set code value of variables used in each experiment and the values of extraction recovery (%) obtained for each compound.

**Table S2.** The magnitude of the effects and the significance level for the variables and their interactions.

**Table S3.** Results obtained for contaminated milk and egg samples.

**Table S4.** Results of steroids and NSAIDs obtained on the milk analyzed samples.

**Table S5.** Results of steroids and NSAIDs obtained on the milk analyzed samples.

**Table S6.** Physical-chemical properties of tested compounds and abbreviations.

**Figure S1.** The optimal conditions predicted by model, minimum, maximum and optimum extraction recovery values, and the value of desirability function.

**Figure S2.** Map indication of all 15 sampling points in the investigated area.

**Table S1.** The set code value of variables used in each experiment and the values of extraction recovery (%) obtained for each compound.

| Exp. no | Salt (X1) | Disperser (X2) | Extractant (X3) | pH (X4) | HCOR | E1   | E3   | EE2  | E2   | KET  | NAP  | IBU  | DI C |
|---------|-----------|----------------|-----------------|---------|------|------|------|------|------|------|------|------|------|
| 1       | 1         | -1             | -1              | -1      | 12.3 | 42.9 | 52.6 | 59.4 | 61.9 | 33.4 | 34.5 | 57.3 | 57.1 |
| 2       | 1         | -1             | 1               | -1      | 25.3 | 68.6 | 77.6 | 87.8 | 92.9 | 84.0 | 89.0 | 91.0 | 92.1 |
| 3       | 1         | 1              | -1              | -1      | 19.1 | 47.1 | 56.3 | 69.2 | 74.3 | 46.1 | 50.3 | 64.5 | 63.8 |
| 4       | 1         | 1              | 1               | -1      | 23.4 | 68.5 | 65.2 | 91.8 | 96.4 | 91.1 | 96.0 | 94.1 | 93.0 |
| 5       | -1        | -1             | -1              | -1      | 11.5 | 30.1 | 58.2 | 71.1 | 75.7 | 39.1 | 50.0 | 59.6 | 54.6 |
| 6       | -1        | -1             | 1               | -1      | 13.9 | 46.6 | 66.7 | 86.0 | 87.4 | 42.0 | 41.3 | 73.9 | 76.0 |
| 7       | -1        | 1              | -1              | -1      | 9.5  | 26.7 | 54.9 | 63.9 | 68.9 | 26.0 | 29.6 | 59.1 | 51.9 |
| 8       | -1        | 1              | 1               | -1      | 18.3 | 53.4 | 51.2 | 89.1 | 90.0 | 53.1 | 54.3 | 78.2 | 81.4 |
| 9       | -1        | -1             | -1              | 1       | 19.7 | 49.5 | 29.0 | 60.4 | 61.8 | 49.5 | 59.7 | 62.8 | 63.4 |
| 10      | -1        | -1             | 1               | 1       | 20.6 | 72.4 | 55.1 | 88.8 | 84.8 | 90.0 | 94.0 | 93.0 | 91.0 |
| 11      | -1        | 1              | -1              | 1       | 14.7 | 44.6 | 24.9 | 67.7 | 68.8 | 44.6 | 54.7 | 67.7 | 70.3 |
| 12      | -1        | 1              | 1               | 1       | 21.6 | 73.3 | 53.9 | 74.0 | 76.2 | 73.3 | 71.6 | 75.4 | 78.8 |
| 13      | 1         | -1             | -1              | 1       | 15.1 | 59.2 | 42.4 | 71.2 | 68.0 | 59.2 | 65.1 | 69.2 | 66.1 |
| 14      | 1         | -1             | 1               | 1       | 28.8 | 78.3 | 65.4 | 85.3 | 81.1 | 78.3 | 78.8 | 79.5 | 78.0 |
| 15      | 1         | 1              | -1              | 1       | 20.1 | 57.8 | 40.0 | 69.3 | 70.0 | 57.8 | 63.1 | 68.7 | 68.3 |
| 16      | 1         | 1              | 1               | 1       | 25.5 | 85.2 | 68.8 | 83.0 | 82.0 | 85.2 | 81.5 | 81.1 | 81.2 |
| 17      | 0         | 0              | 0               | 0       | 27.7 | 77.9 | 68.1 | 71.4 | 60.5 | 82.2 | 86.1 | 81.8 | 83.4 |
| 18      | 0         | 0              | 0               | 0       | 21.8 | 70.2 | 69.5 | 71.8 | 61.5 | 81.6 | 87.2 | 83.1 | 84.3 |
| 19      | 0         | 0              | 0               | 0       | 21.3 | 77.1 | 68.9 | 72.2 | 61.2 | 82.9 | 85.7 | 82.6 | 82.8 |

**Table S2.** The magnitude of the effects and the significance level for the variables and their interactions.

| Source                       | Logworth |                                                                                   | PValue  |   |
|------------------------------|----------|-----------------------------------------------------------------------------------|---------|---|
| Extractant                   | 2.626    |  | 0.00237 |   |
| Salt*Disperser*Extractant*pH | 1.008    |  | 0.09824 |   |
| pH                           | 0.840    |  | 0.14446 | ^ |
| Salt                         | 0.793    |  | 0.16098 | ^ |
| Extractant*pH                | 0.768    |  | 0.17046 | ^ |
| Disperser*Extractant*pH      | 0.724    |  | 0.18865 | ^ |
| Salt*Disperser*Extractant    | 0.577    |  | 0.26460 | ^ |
| Salt*Extractant*pH           | 0.569    |  | 0.26985 | ^ |
| Disperser*pH                 | 0.566    |  | 0.27171 | ^ |
| Salt*pH                      | 0.562    |  | 0.27410 | ^ |
| Salt*Disperser               | 0.560    |  | 0.27534 | ^ |
| Disperser*Extractant         | 0.468    |  | 0.34066 | ^ |
| Salt*Disperser*pH            | 0.370    |  | 0.42697 | ^ |
| Salt*Extractant              | 0.321    |  | 0.47723 | ^ |
| Disperser                    | 0.220    |  | 0.60312 | ^ |

**Figure S1.** The optimal conditions predicted by model, minimum, maximum and optimum extraction recovery values, and the value of desirability function.

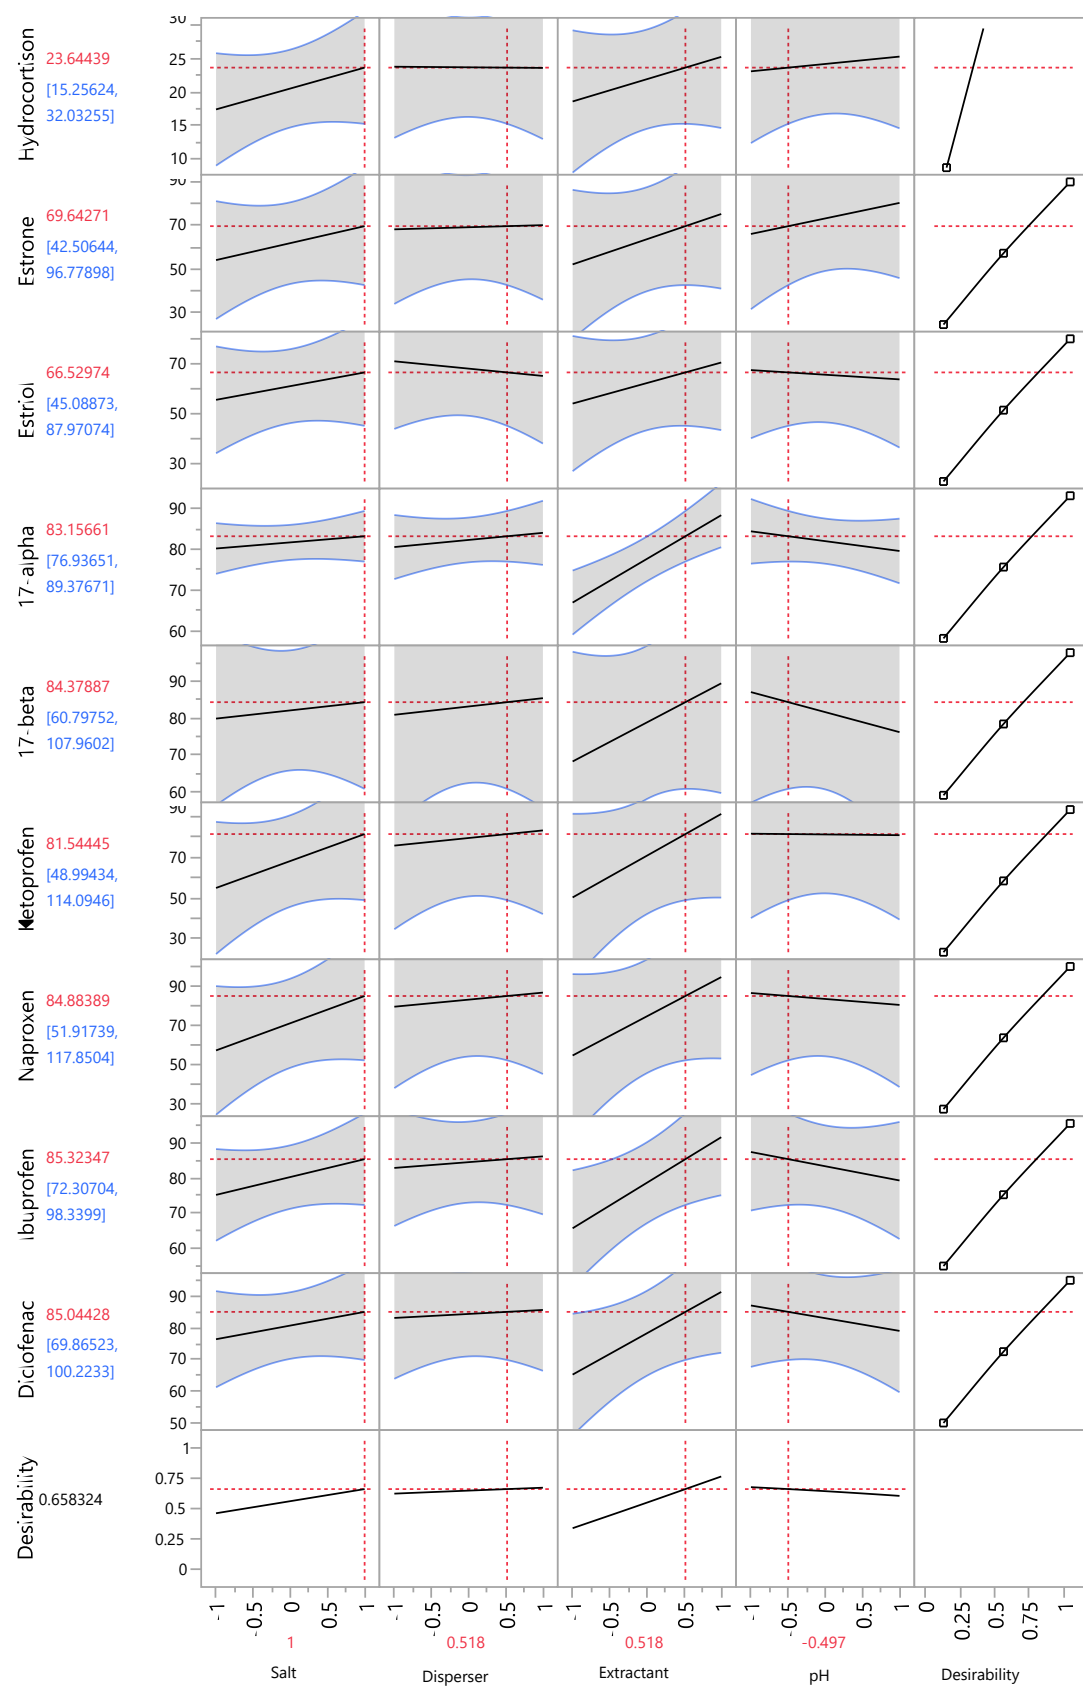

**Table S3.** Results obtained for contaminated milk and egg samples.

| Samples/<br>compounds | Amount found in samples [ng] |              |              |              |              |              |              |              |              |
|-----------------------|------------------------------|--------------|--------------|--------------|--------------|--------------|--------------|--------------|--------------|
|                       | HCOR                         | E1           | E2           | EE2          | E3           | KET          | NAP          | DIC          | IBU          |
| Milk initial          | nd                           | 0.11         | 0.06         | 1.18         | 0.08         | nd           | 0.40         | 0.07         | 0.30         |
| Milk spiked 1         | 10.83                        | 86.72        | 89.50        | 81.40        | 63.46        | 76.80        | 74.70        | 74.46        | 87.07        |
| Milk spiked 2         | 9.98                         | 85.46        | 87.61        | 82.91        | 63.29        | 77.89        | 74.02        | 75.12        | 88.21        |
| Milk spiked 3         | 10.60                        | 86.01        | 87.68        | 84.84        | 64.2         | 78.89        | 74.49        | 74.17        | 87.92        |
| Average milk          | <b>10.47</b>                 | <b>86.06</b> | <b>88.26</b> | <b>83.05</b> | <b>63.32</b> | <b>77.86</b> | <b>74.40</b> | <b>74.58</b> | <b>87.73</b> |
| Standard deviation    | 0.44                         | 0.63         | 1.07         | 1.72         | 0.13         | 1.04         | 0.34         | 0.48         | 0.59         |
| Egg initial           | nd                           | 0.28         | 0.26         | nd           | 0.35         | 0.17         | 0.82         | 0.12         | 1.57         |
| Egg spiked 1          | 10.66                        | 85.85        | 92.20        | 90.87        | 63.25        | 76.05        | 77.91        | 78.34        | 95.07        |
| Egg spiked 2          | 9.77                         | 81.61        | 87.66        | 86.98        | 65.87        | 76.71        | 75.68        | 76.85        | 92.02        |
| Egg spiked 3          | 10.5                         | 82.73        | 89.9         | 88.83        | 63.74        | 75.48        | 76.5         | 77.7         | 94.54        |
| Average Egg           | <b>10.31</b>                 | <b>83.40</b> | <b>89.92</b> | <b>88.89</b> | <b>64.29</b> | <b>76.08</b> | <b>76.70</b> | <b>77.63</b> | <b>93.88</b> |
| Standard deviation    | 0.47                         | 2.20         | 2.27         | 1.95         | 1.39         | 0.62         | 1.13         | 0.75         | 1.63         |

“nd” – not detected

**Table S4.** Results of steroids and NSAIDs obtained on the milk analyzed samples.

| Sampling point | Concentration [ $\mu\text{g/L}$ ] |      |      |      |      |      |      |      |
|----------------|-----------------------------------|------|------|------|------|------|------|------|
|                | E1                                | E2   | EE2  | E3   | KET  | NAP  | DIC  | IBU  |
| Almaşu         | 0.97                              | <MDL |
| Avrămeşti      | 0.85                              | 1.10 | 0.87 | <MDL | 1.03 | 1.23 | 0.78 | 2.18 |
| Băgaciu        | <MDL                              | <MDL | <MDL | <MDL | <MDL | <MDL | <MDL | <MDL |
| Coltău         | <MDL                              | <MDL | <MDL | <MDL | <MDL | <MDL | <MDL | 3.41 |
| Delenii        | 1.59                              | <MDL | 2.54 | 0.77 | 0.90 | <MDL | 0.71 | 1.15 |
| Diosig         | <MDL                              | <MDL | <MDL | <MDL | <MDL | <MDL | <MDL | <MDL |
| Gorneşti       | <MDL                              | <MDL | 1.31 | <MDL | <MDL | <MDL | <MDL | <MDL |
| Gurghiu        | <MDL                              | <MDL | 1.86 | <MDL | <MDL | <MDL | <MDL | <MDL |
| Racoviţa       | <MDL                              | 1.62 | 4.30 | 0.95 | <MDL | <MDL | <MDL | <MDL |
| Roşia Montana  | <MDL                              | <MDL | 0.67 | <MDL | <MDL | <MDL | <MDL | <MDL |
| Saschiz        | <MDL                              | <MDL | 1.32 | <MDL | <MDL | <MDL | <MDL | <MDL |
| Şaeş           | <MDL                              | 1.92 | 3.49 | <MDL | <MDL | <MDL | <MDL | 2.90 |
| Terebeşti      | <MDL                              | <MDL | <MDL | <MDL | <MDL | <MDL | <MDL | 2.66 |
| Turulung       | <MDL                              | <MDL | <MDL | <MDL | <MDL | <MDL | 0.77 | 1.76 |
| Țețchea        | <MDL                              | <MDL | <MDL | 0.86 | <MDL | <MDL | <MDL | 0.81 |

MDL- method detection limit

**Table S5.** Results of steroids and NSAIDs obtained on the egg analyzed samples.

| Sample point  | Concentration [ $\mu\text{g/kg}$ ] |      |      |      |      |      |      |      |
|---------------|------------------------------------|------|------|------|------|------|------|------|
|               | E1                                 | E2   | EE2  | E3   | KET  | NAP  | DIC  | IBU  |
| Almaşu        | <MDL                               | <MDL | <MDL | 0.98 | 0.81 | <MDL | <MDL | 0.89 |
| Avrămeşti     | <MDL                               | 1.42 | <MDL | <MDL | 0.98 | 1.63 | <MDL | 2.20 |
| Băgaciu       | 0.73                               | 2.79 | 2.23 | <MDL | <MDL | 2.10 | <MDL | <MDL |
| Coltău        | <MDL                               | 2.69 | 2.04 | <MDL | 1.99 | 1.68 | <MDL | 2.28 |
| Delenii       | <MDL                               | 2.64 | <MDL | 1.08 | <MDL | <MDL | <MDL | 2.11 |
| Diosig        | <MDL                               | <MDL | <MDL | 1.16 | <MDL | 1.26 | <MDL | <MDL |
| Gorneşti      | <MDL                               | 2.79 | 2.19 | 1.99 | <MDL | 2.10 | <MDL | 1.76 |
| Gurghiu       | <MDL                               | <MDL | <MDL | <MDL | <MDL | <MDL | <MDL | 1.44 |
| Racoviţa      | <MDL                               | <MDL | <MDL | <MDL | <MDL | <MDL | <MDL | <MDL |
| Roşia Montana | <MDL                               | <MDL | 0.89 | <MDL | 0.78 | <MDL | <MDL | <MDL |
| Saschiz       | <MDL                               | <MDL | <MDL | 1.01 | <MDL | <MDL | <MDL | <MDL |
| Şaeş          | <MDL                               | <MDL | <MDL | <MDL | 1.28 | 1.71 | <MDL | <MDL |
| Terebeşti     | <MDL                               | <MDL | <MDL | 0.89 | <MDL | <MDL | <MDL | 0.98 |
| Turulung      | <MDL                               | <MDL | <MDL | <MDL | 0.89 | 1.72 | <MDL | 1.62 |
| Țețchea       | <MDL                               | <MDL | <MDL | 0.98 | <MDL | <MDL | <MDL | <MDL |

MDL- method detection limit



**Table S6.** Physical-chemical properties of tested compounds and abbreviations

| Compound name                 | Molecular formula                                                                   | Abbreviation | LogP | pKa   |
|-------------------------------|-------------------------------------------------------------------------------------|--------------|------|-------|
| Ibuprofen                     | 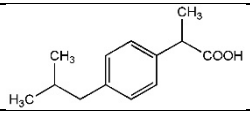   | IBU          | 3.97 | 5.03  |
| Diclofenac                    |    | DIC          | 4.51 | 4.15  |
| Ketoprofen                    |    | KET          | 3.12 | 4.45  |
| Naproxen                      |    | NAP          | 3.18 | 4.15  |
| Hydrocortisone                |   | HCOR         | 1.61 | 12.59 |
| Estrone                       |  | E1           | 2.6  | 10.77 |
| 17 $\beta$ -estradiol         |  | E2           | 4.01 | 10.08 |
| 17 $\alpha$ -ethynylestradiol |  | EE2          | 3.67 | 10.21 |
| Estriol                       |  | E3           | 2.45 | 10.54 |

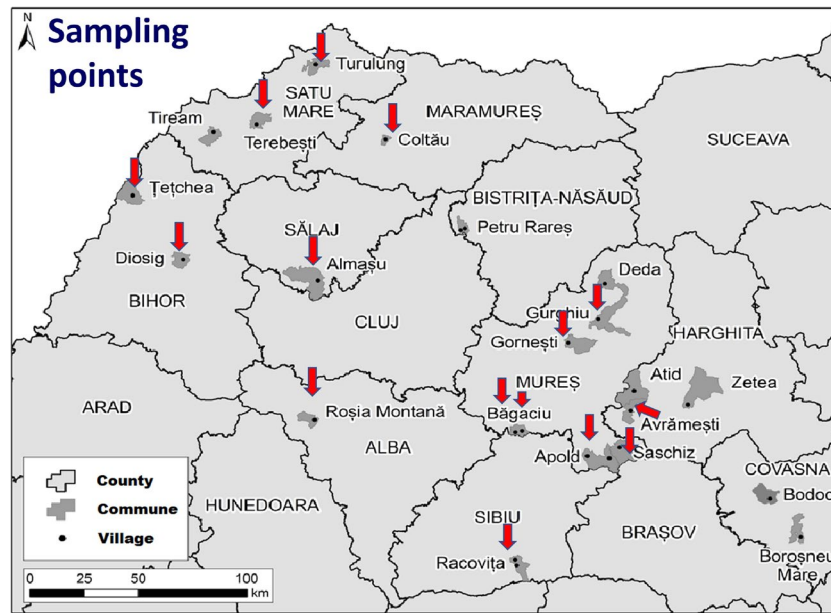

**Figure S2.** Map indication of all 15 sampling points in the investigated area
